# Supplementary material for: 326K at E Protein Is Critical for Mammalian Adaption of TMUV
Source: MDPI journal article supplement (doi:10.3390/v15122376), 2023-12-01
Supplement: s1 [file s1]

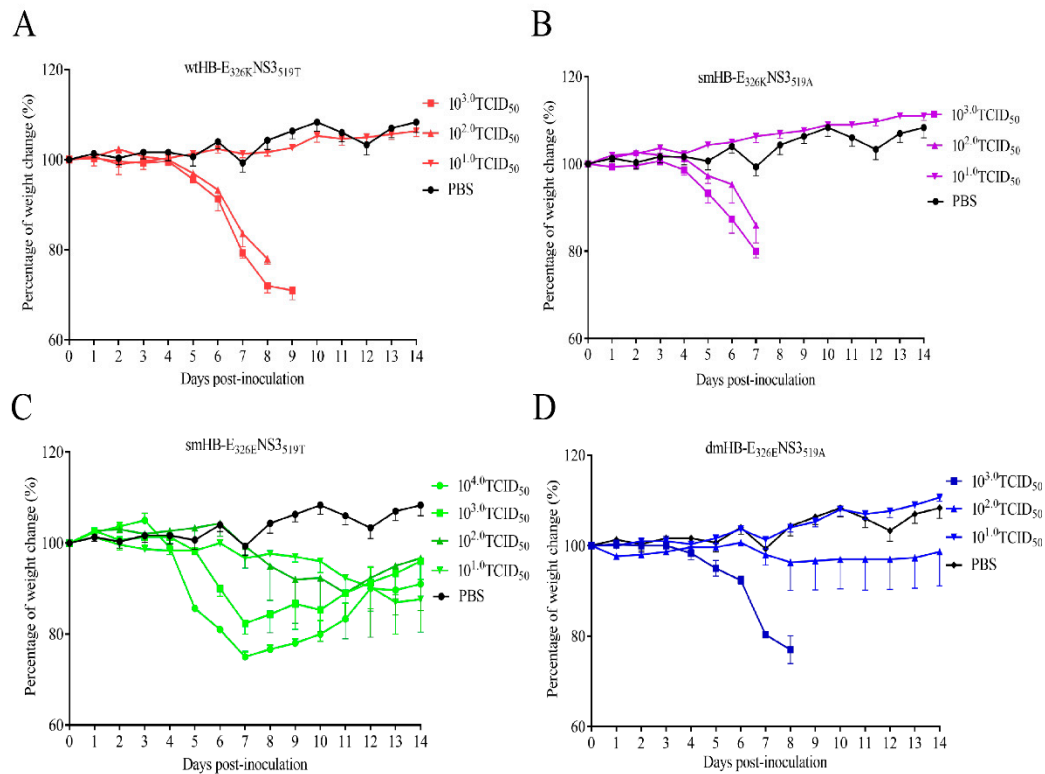

Figure S1. Weight change curves of mice. (A to D) Five-week-old BALB/c mice were infected by the i.c. route with four viruses at different doses ( $10^{1.0}$ ,  $10^{2.0}$ ,  $10^{3.0}$  or  $10^{4.0}$  TCID<sub>50</sub>), respectively or mock infected. Animals were monitored daily for the appearance of symptoms and weight changes were recorded during the two weeks period of observation.

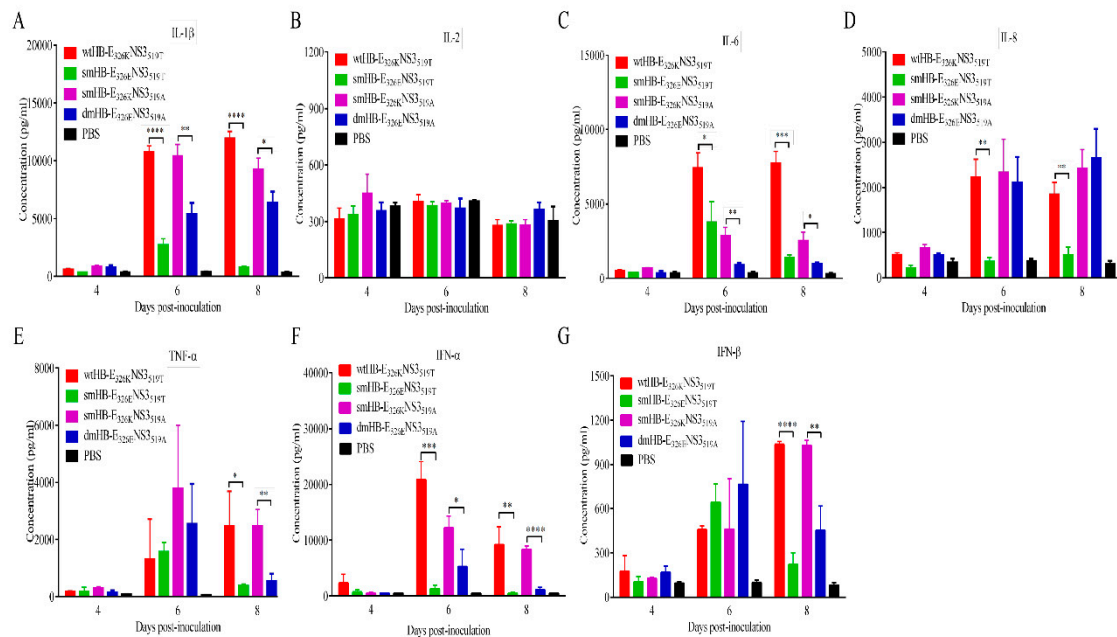

Figure S2. The wtHB-E326K-NS3<sub>519T</sub> and mutant viruses induce different protein levels inflammatory cytokines in the mouse brain. Five-week-old BALB/c mice were infected by the i.c. route with virus at a dose  $10^{3.0}$  TCID<sub>50</sub>. Supernatants of infected mouse brain homogenates

were collected for measurement of pro-inflammatory cytokines(A-E) and IFN- $\alpha/\beta$  (F and G) at protein levels by ELISA. (\*\*\*\*,  $p < 0.0001$ ; \*\*\*,  $p < 0.001$ ; \*\*,  $p < 0.01$ ; \*,  $p < 0.05$ ).

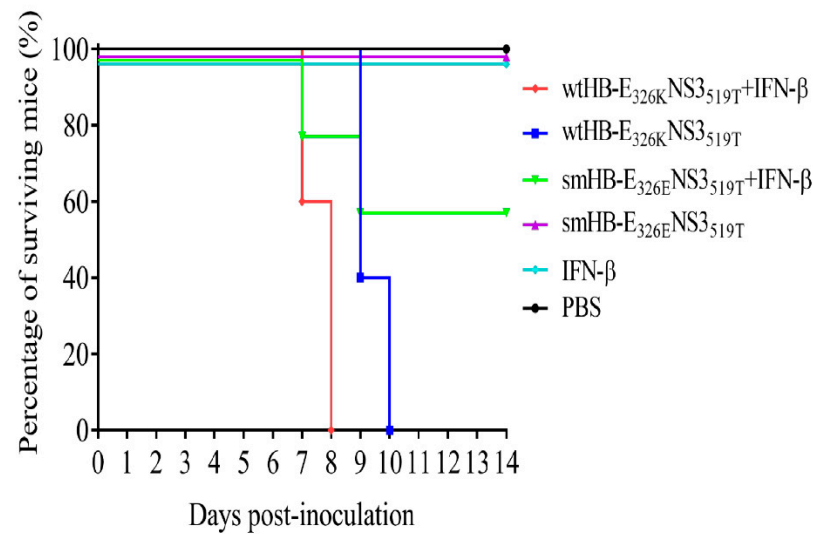

Figure S3. The death of infected mice was promoted by i.c. injection of IFN- $\beta$ . Five-week-old BALB/c mice were infected by the i.c. route with virus at a dose  $10^{3.0}$  TCID<sub>50</sub>. Human recombinant IFN- $\beta$  was injected into the brain of mice at a dose of 3000 U at 3 dpi and 5 dpi to observe the survival of the mice.

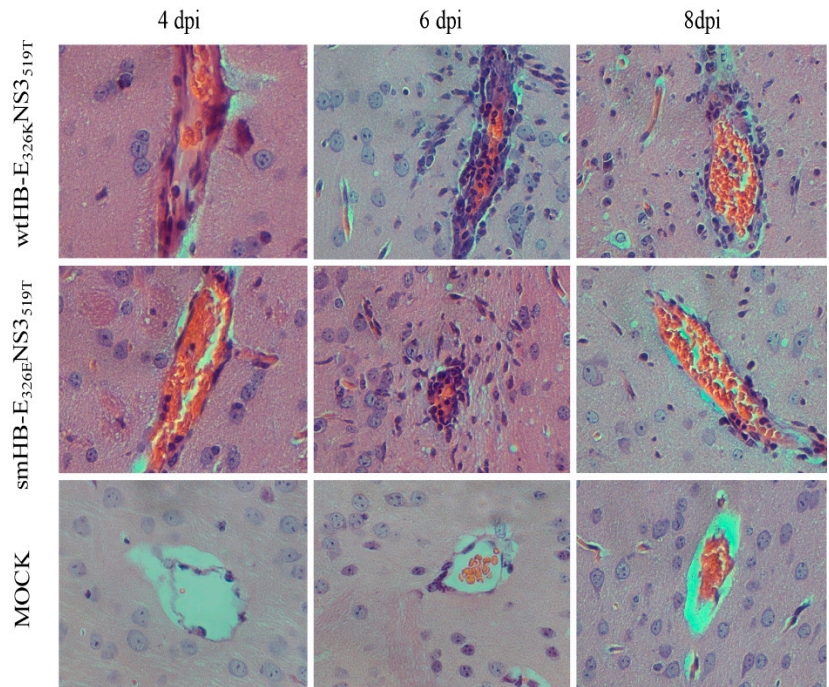

Figure S4. Histopathologic analysis of the hematoxylin and eosin (HE)-stained brain tissue of mice infected. Five-week-old female BALB/c mice were infected by the i.c. route with wtHB-E<sub>326K</sub>NS<sub>3519T</sub> and smHB-E<sub>326E</sub>NS<sub>3519T</sub> at a dose  $10^{3.0}$  TCID<sub>50</sub>. Brain tissues of infected mice was collected at 4, 6, and 8 dpi for histopathological analysis.



Table S1. Primers used in the study

| Primer name            | Sequence (5' to 3')                                       | Positions   | Application                           |
|------------------------|-----------------------------------------------------------|-------------|---------------------------------------|
| HBRT1                  | ACACATCGGGTAGGTC                                          | 1856-1871   | Specific reverse transcription primer |
| HBRT2                  | CCTTCTCAAAATCTCC                                          | 3578-3593   | Specific reverse transcription primer |
| HBRT3                  | ATCTCTGTGATGCTCC                                          | 4404-4419   | Specific reverse transcription primer |
| HBRT4                  | GTCAACCTTGTCCCGC                                          | 2433-2457   | Specific reverse transcription primer |
| HBRT5                  | TGCCGTCGCTGGTCTCAA                                        | 3806-3831   | Specific reverse transcription primer |
| HBRT6                  | TAACCTCTCACTTCCT                                          | 3656-3680   | Specific reverse transcription primer |
| HBRT7                  | AGACTCTGTGTTCTAC                                          | 10957-10991 | Specific reverse transcription primer |
| HBT7-1F                | CCCGGGTAATACGACTCACTATAGGGA<br>GAAGTTCATCTGTGTGAAGTTATTCC | 1-27        | Amplifying HB                         |
| HB-956R                | GCTGTACGCTGGGGC                                           | 942-956     | Amplifying HB                         |
| HB-942F                | GCCCCAGCGTACAGCTT                                         | 942-958     | Amplifying HB                         |
| HB-2459R               | GGCATTGACATTTACTGCC                                       | 2441-2459   | Amplifying HB                         |
| HB-2433F               | GTCTTCCTGGCAGTAAATGTCAATG                                 | 2433-2457   | Amplifying HB                         |
| HB-3831R               | ATCTGCTTTCCTGATTGCTCCACTTC                                | 3806-3831   | Amplifying HB                         |
| HB-3656F               | AGGAATCACGTACAGTGATCTGGTC                                 | 3656-3680   | Amplifying HB                         |
| HB-10991R              | AGACTCTGTGTTCTACCACCACCAGCC<br>ACACTTC                    | 10957-10991 | Amplifying HB                         |
| E-K326E-F              | GGCACTGTCGTGGTGGAAATTGT                                   | 1917-1938   | E K326E mutation                      |
| E-K326E-R              | ACAATTCCACCACGACAGTGCC                                    | 1917-1938   | E K326E mutation                      |
| NS3-T519A-F            | GACAAGGTTGACGCAATTGATG                                    | 6132-6153   | NS3 T519A mutation                    |
| NS3-T519A-R            | CATCAATTGCGTCAACCTTGTC                                    | 6132-6153   | NS3 T519A mutation                    |
| HB-E-1936-F            | TGTCTTATGCAGGTACCGATG                                     | 1936-2040   | qRT-PCR primer                        |
| HB-E-2040-R            | CGTATGGGTTGACTGTTATCA                                     | 1936-2040   | qRT-PCR primer                        |
| HB-E-probe             | FAM-AGTTCCCATATCCATGTC-TAMRA                              | 1967-1984   | Probe primer                          |
| qMouse-IL-1 $\beta$ -F | GGTGTGTGACGTTCCCATTA                                      | –           | qRT-PCR primer                        |
| qMouse-IL-1 $\beta$ -R | ATTGAGGTGGAGAGCTTTCAG                                     | –           | qRT-PCR primer                        |
| qMouse-IL-2-F          | TGAGCAGGATGGAGAATTACAG                                    | –           | qRT-PCR primer                        |
| qMouse-IL-2-R          | GAGGTCCAAGTTCATCTTCTAGG                                   | –           | qRT-PCR primer                        |
| qMouse-IL-6-F          | CTTCCATCCAGTTGCCTTCT                                      | –           | qRT-PCR primer                        |



|                         |                         |   |                |
|-------------------------|-------------------------|---|----------------|
| qMouse-IL-6-R           | CTCCGACTTGTGAAGTGGTATAG | – | qRT-PCR primer |
| qMouse-IL-8-F           | TGGGAGAATTCAAGGTGGATAAG | – | qRT-PCR primer |
| qMouse-IL-8-R           | GACAGCATCTGGCAGAATAGAG  | – | qRT-PCR primer |
| qMouse-TNF- $\alpha$ -F | GTTCTATGGCCCAGACCCTCA   | – | qRT-PCR primer |
| qMouse-TNF- $\alpha$ -R | CAGCAAGCATCTATGCACTTAG  | – | qRT-PCR primer |
| qMouse-IFN- $\alpha$ -F | CCCGCAGGAGAAGGTGGAT     | – | qRT-PCR primer |
| qMouse-IFN- $\alpha$ -R | GAGCTGCTGGTGGAGGTCA     | – | qRT-PCR primer |
| qMouse-IFN- $\beta$ -F  | GCTGCGTTCCTGCTGTGCT     | – | qRT-PCR primer |
| qMouse-IFN- $\beta$ -R  | CATCTTCTCCGTCATCTCCA    | – | qRT-PCR primer |
| qMouse-IFN- $\gamma$ -F | ACTGGCAAAAGGATGGTGAC    | – | qRT-PCR primer |
| qMouse-IFN- $\gamma$ -R | TGAGCTCATTGAATGCTTGG    | – | qRT-PCR primer |
| qMouseGAPDH-F           | GAGGCCGGTGCTGAGTATGT    | – | qRT-PCR primer |
| qMouseGAPDH-R           | CGGCAGAAGGGGCGGAGATG    | – | qRT-PCR primer |
| qMouse-RIG-I-F          | GAGCCAGCGGAGATAACAATA   | – | qRT-PCR primer |
| qMouse-RIG-I-R          | CCCACGTACTCATAGAGAATGAC | – | qRT-PCR primer |
| qMouse-MDA5-F           | GCTAAAGACGGAAATCGCAAAG  | – | qRT-PCR primer |
| qMouse-MDA5-R           | GAATGTCTCCAGGTGGCTATATG | – | qRT-PCR primer |
| qMouse-TLR3-F           | ACCTCCAGAAGAACCTCATAAC  | – | qRT-PCR primer |
| qMouse-TLR3-R           | GAACGGATTGAAGCGCATATC   | – | qRT-PCR primer |
| qMouse-TLR7-F           | AACCTTTCCCAGAGCATAACAG  | – | qRT-PCR primer |
| qMouse-TLR7-R           | GGAGCCTCTGATGAGACAAATAA | – | qRT-PCR primer |
| qMouse-IRF3-F           | GTCTTAAGGAGCTGTAGAGATGG | – | qRT-PCR primer |
| qMouse-IRF3-R           | TGGTCAGAGGTAAGGGAGATAG  | – | qRT-PCR primer |
| qMouse-IRF7-F           | TTCTGCAGTACAGCCACATAC   | – | qRT-PCR primer |
| qMouse-IRF7-R           | GCATAGGGTTCCTCGTAAACA   | – | qRT-PCR primer |

Table S2. The reference virus strain information

| Strains      | GenBank No. | Source   | Date |
|--------------|-------------|----------|------|
| FX2010       | MH414568.1  | Duck     | 2010 |
| BYD-1        | JF312912.1  | Duck     | 2010 |
| pigeon       | JQ920425.1  | pigeon   | 2012 |
| CJD05        | JF926699.2  | Chicken  | 2010 |
| AHQY         | KJ740748.1  | Duck     | 2013 |
| HN2015       | MN649261.1  | Duck     | 2015 |
| SDMS         | KC333867.1  | Mosquito | 2012 |
| GS-PT-7      | JQ627864.1  | Goose    | 2010 |
| CQW1         | KM233707.1  | Duck     | 2013 |
| SD201120     | KY623423.1  | Duck     | 2011 |
| GA           | MK907880.1  | Duck     | 2018 |
| AQ-19        | MT708901.1  | Goose    | 2019 |
| HB2016       | MN649266.1  | Duck     | 2016 |
| H            | MT108702.1  | Duck     | 2019 |
| DK/TH/CU-1   | KR061333.1  | Duck     | 2013 |
| D1921/1/3MY  | KX097990.1  | Duck     | 2012 |
| D1977/1/MY   | KX097989.1  | Duck     | 2012 |
| DK-TH-CU2007 | MF621927.1  | Duck     | 2007 |
| Sitiawan     | JX477686.1  | Chicken  | 2002 |
| MM1775       | JX477685.2  | Mosquito | 1995 |
| TP1906       | MN747003.2  | Mosquito | 2019 |
| YN12115      | KT607935.1  | Mosquito | 2012 |
| GX2021       | OM240641.1  | Chicken  | 2021 |
| SD2021       | OM240640.1  | Chicken  | 2021 |
| YN12193      | KT607936.1  | Mosquito | 2012 |
| SD14         | MH748542.1  | Duck     | 2014 |
| CTLN         | MZ355579.1  | Chicken  | 2020 |
